# Supplementary material for: Molecular mechanisms and associated cell signalling pathways underlying the anticancer properties of phytochemical compounds from Aloe species (Review)
Source: PubMed Central journal article supplement — Exp Ther Med. 2021 Jun 8;22(2):852. doi: 10.3892/etm.2021.10284 (PMC8220653; doi:10.3892/etm.2021.10284), 2021-06-08

Figure S1. Summary of the effects of selected *Aloe* phytochemical compounds on the cell death pathway in cancer cells. (A) Intrinsic mitochondrial apoptotic signalling; (B) p53-dependent apoptosis; (C) extrinsic apoptotic signalling. Solid arrows indicate stimulation, whereas dashed arrows indicate suppression.

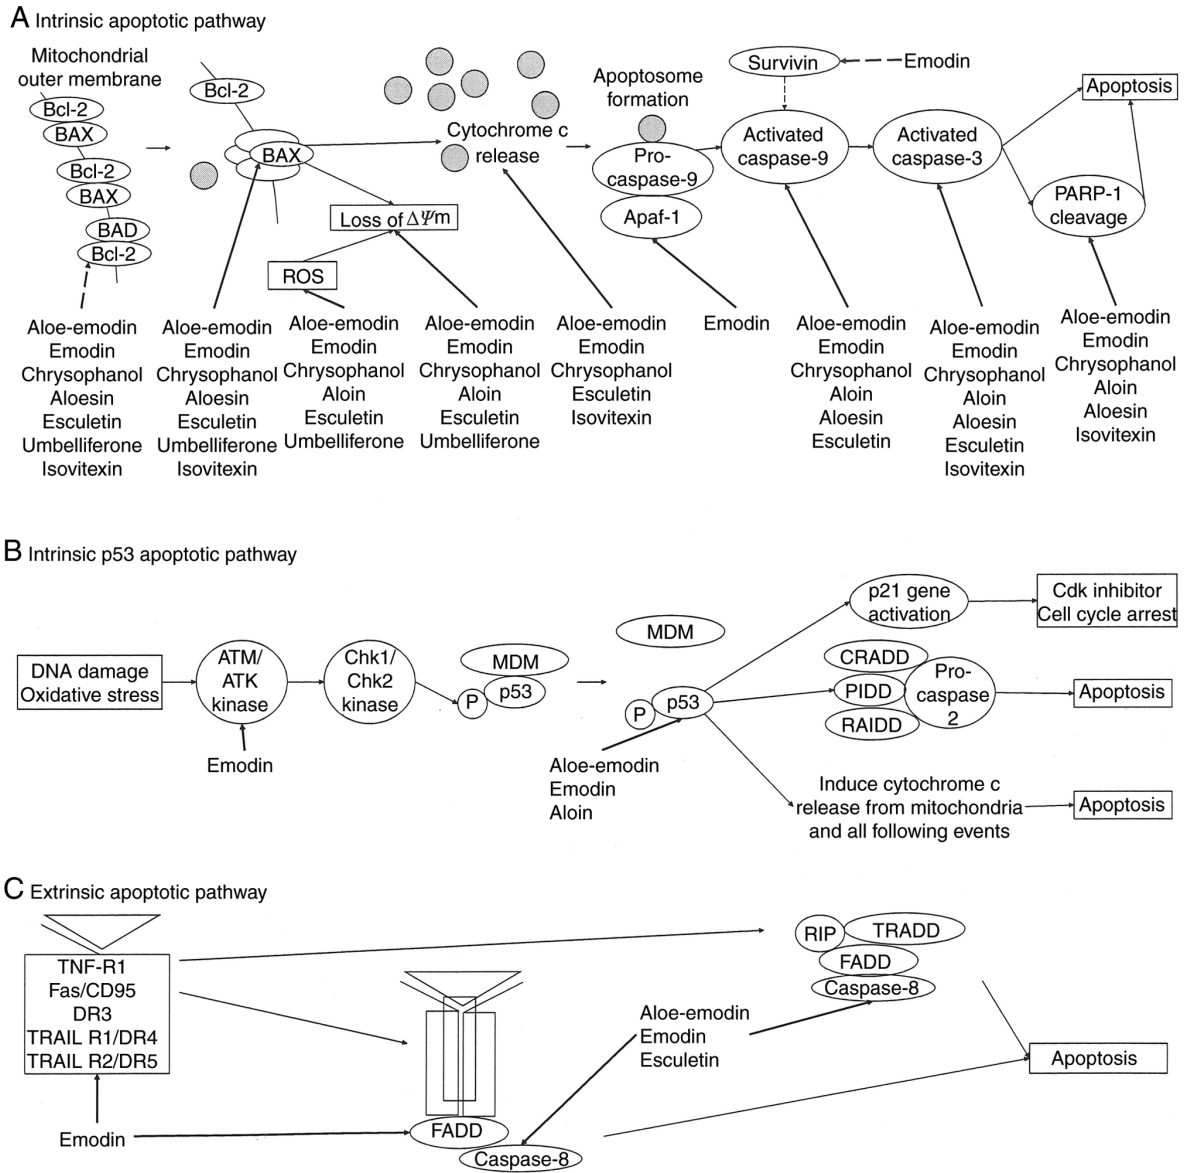

Figure S2. Effects of *Aloe* phytochemical compounds on cell cycle regulation in cancer. Solid arrows indicate stimulation; dashed arrows indicate suppression; grey shades display inhibitors of the pathway.

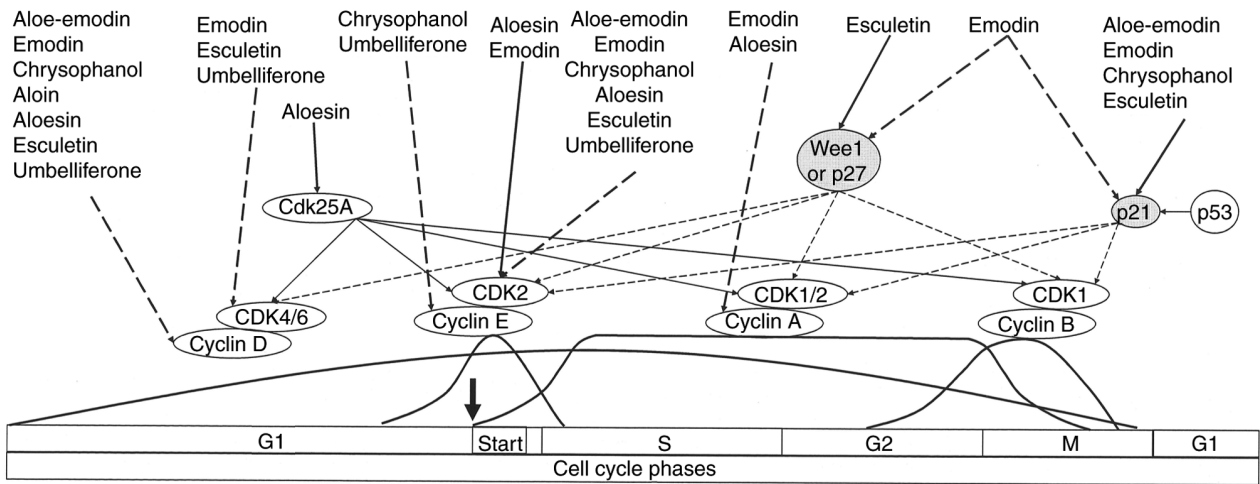

Figure S3. Effects of *Aloe* phytochemical compounds on the key signalling pathways in cancer models. (A) PI3P/AKT pathway; (B) JAK/STAT pathway; (C) MAPK/ERK pathway; (D) MAPK/JNK/p38 pathway; (E) TGF- $\beta$  pathway; (F) Wnt pathway; (G) TNF- $\alpha$ -NF- $\kappa$ B pathway. Solid arrows indicate stimulation; dashed arrows indicate suppression; grey shades indicate inhibitors of the pathway.

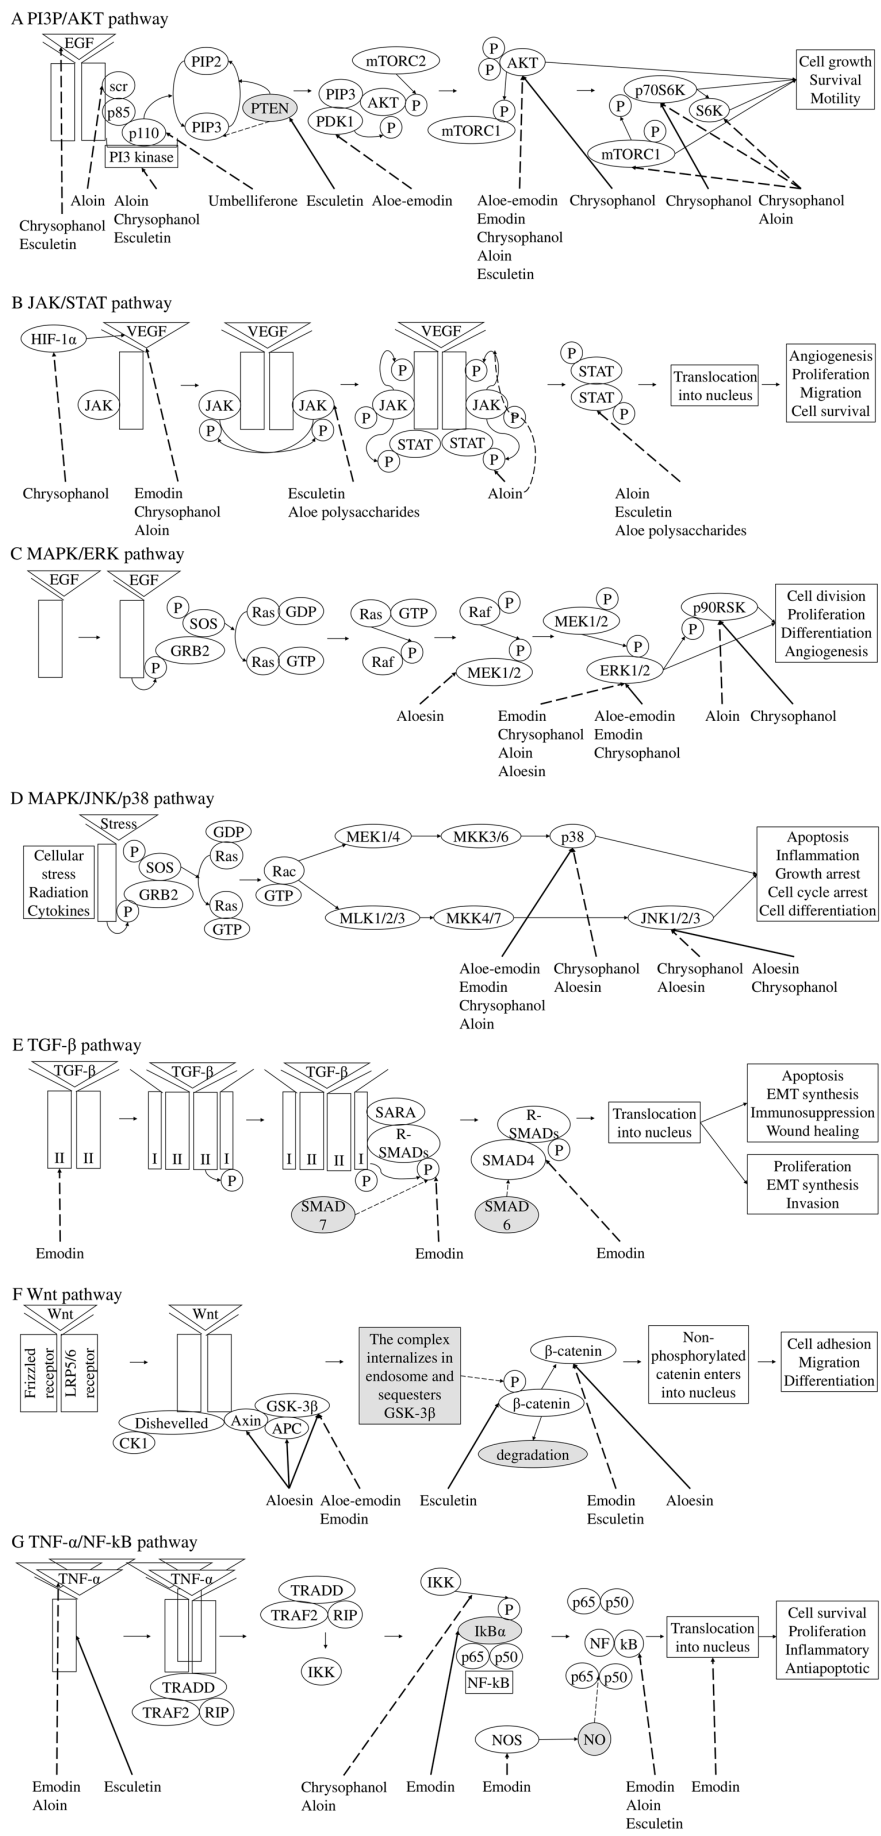

Supplement: Supplementary_Data.pdf [file Supplementary_Data.pdf]
